# Supplementary material
Source: Research Square preprint supplement (doi:10.21203/rs.3.rs-9653429/v1)
Supplement: Supplementary file 4 [file intro2.pdf › IJCAI-main/paper/intro2.pdf]

## “Learning interactions with IDs”

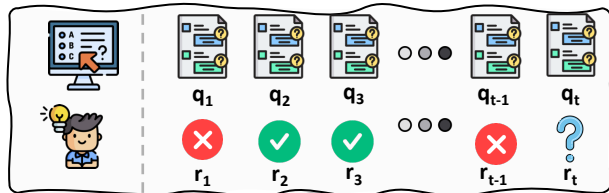

conversion

## “Learning interactions with multi-turn dialogues”

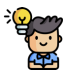

**<history>** null **<history>**, **<query>** Given question  $q_1$ , involving concept  $c_1$ . Prediction whether the student will response correctly, Yes or No. **<query>**

(null), ( $q_1, ?$ )

$r_1$

No

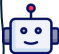

○ growing historical  
● records over time

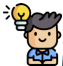

**<history>** The student has answered question  $q_1$  involving concept  $c_1$  **incorrectly** at time 1, ..., question  $q_{t-1}$  involving concept  $c_{t-1}$  **incorrectly** at time t-1. **<history>**, **<query>** Given question  $q_t$ , involving concept  $c_t$  at time t. Prediction whether the student will response correctly, Yes or No. **<query>**

(null), ( $q_1, r_1$ ), ( $q_2, r_2$ ), ( $q_3, r_3$ ), ..., ( $q_{t-1}, r_{t-1}$ ), ( $q_t, ?$ )

$r_t$

No

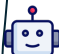

a) Comparison of training dataset formats.

## “ID-based DLKT”

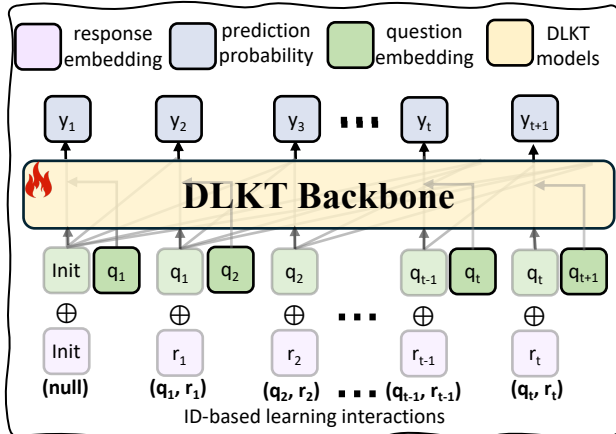

## “Dialogue-driven LLM-based KT”

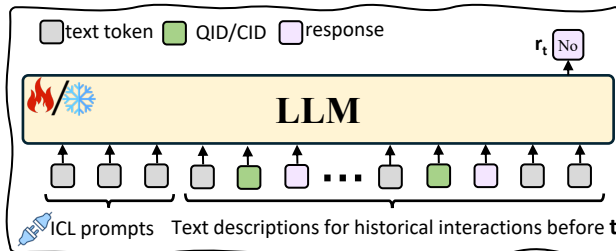

b) DLKT vs LLM-based KT.
