# Supplementary material
Source: Research Square preprint supplement (doi:10.21203/rs.3.rs-9653429/v1)

# Performance Comparison of Different Methods

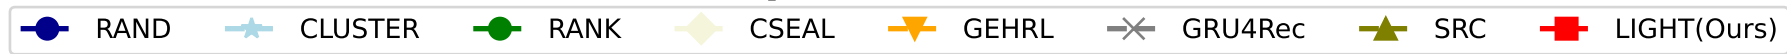

## ASSIST09 Dataset

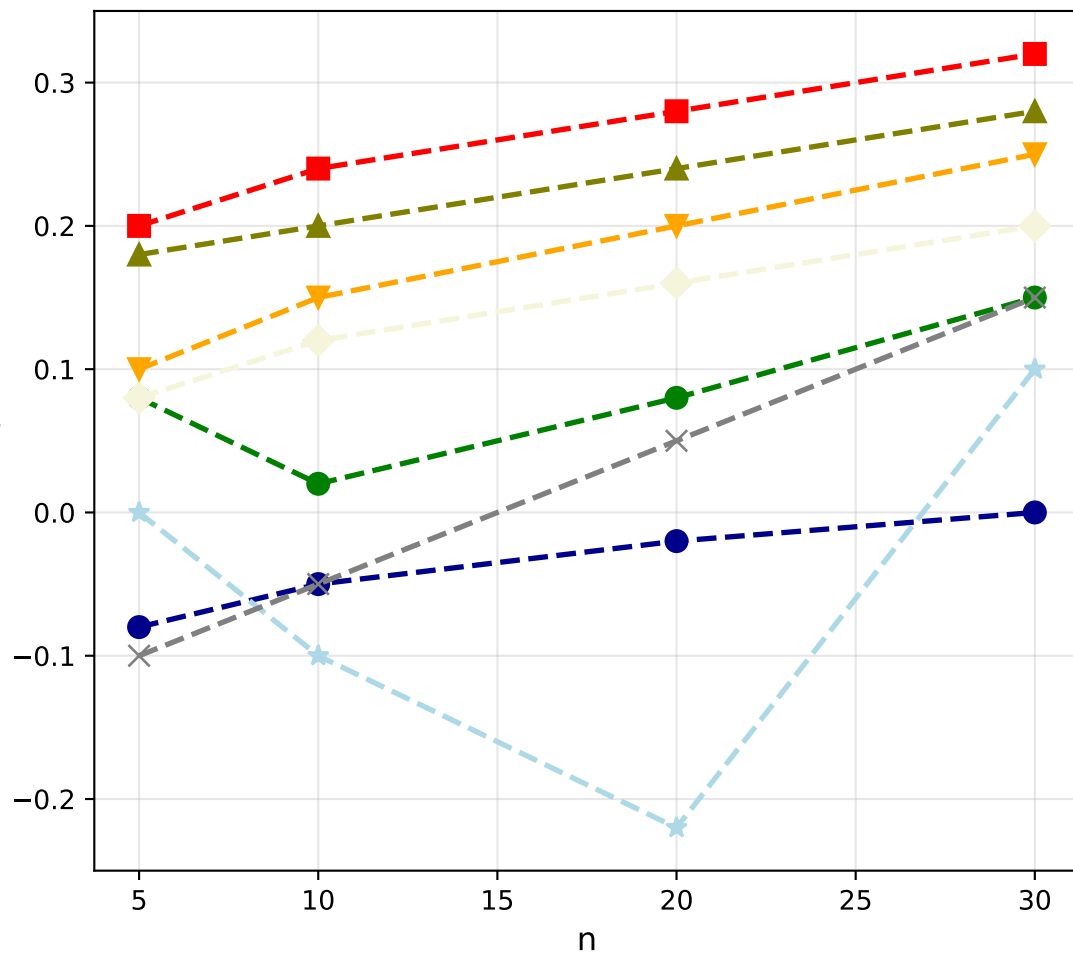

## ASSIST12 Dataset

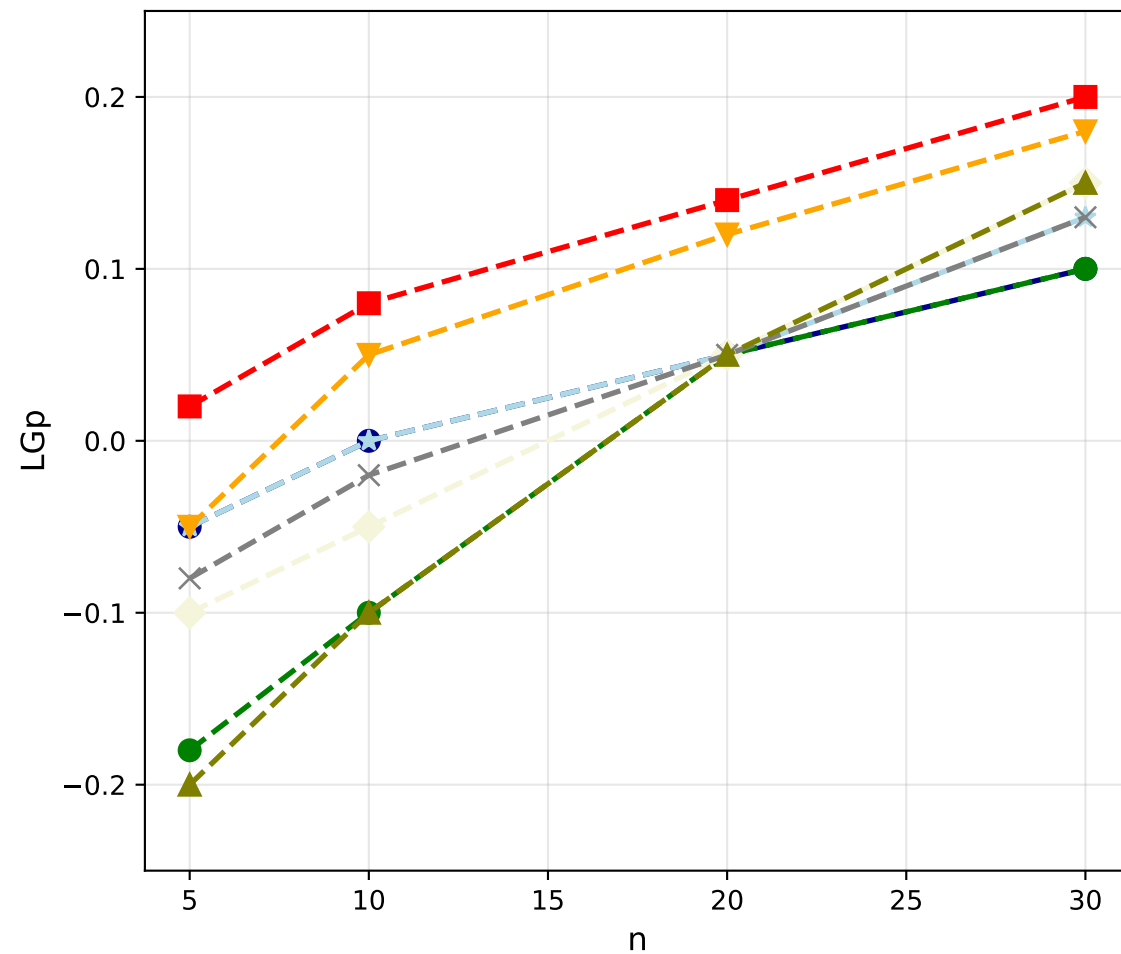

## SLP-Math Dataset

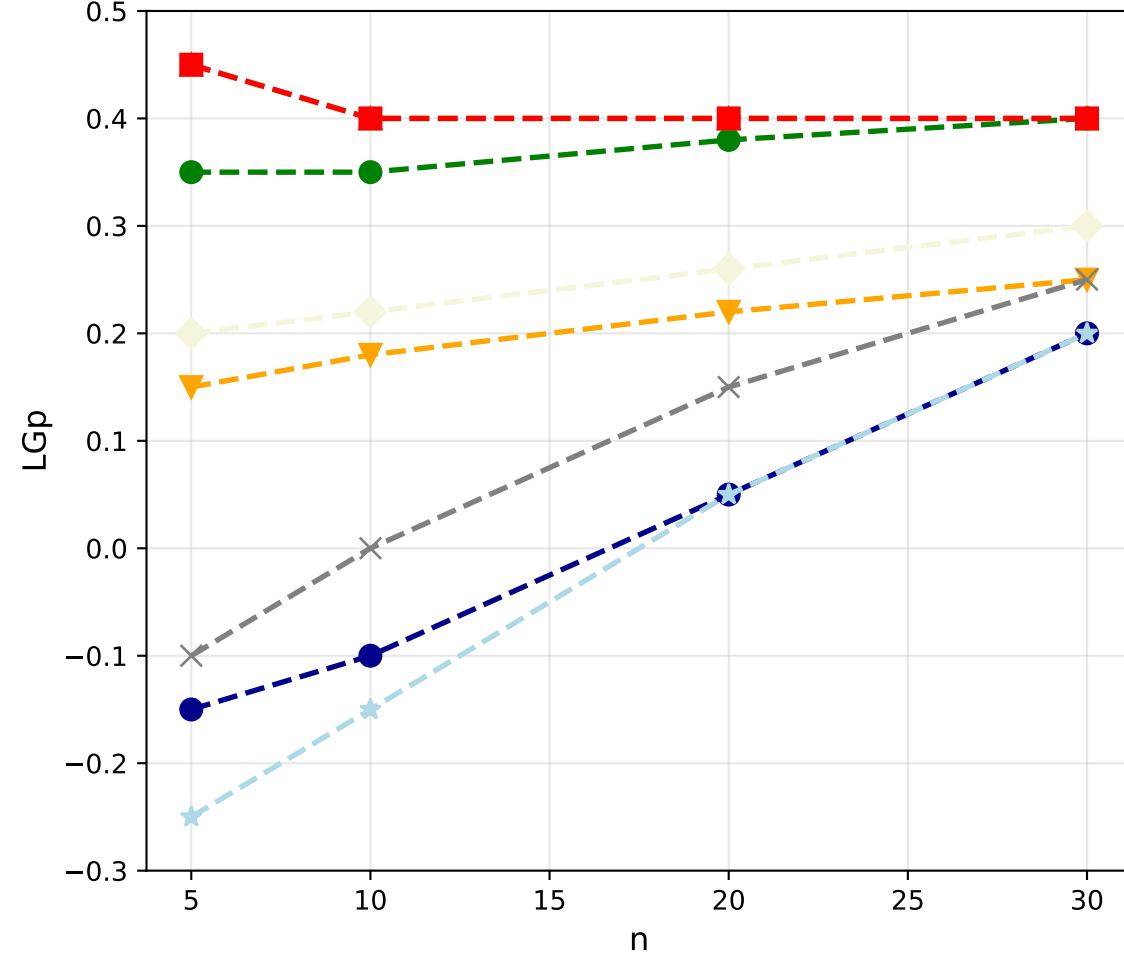

Supplement: Supplementary file 1 [file performance_comparison.pdf › IJCAI-main/analysis/performance_comparison.pdf]

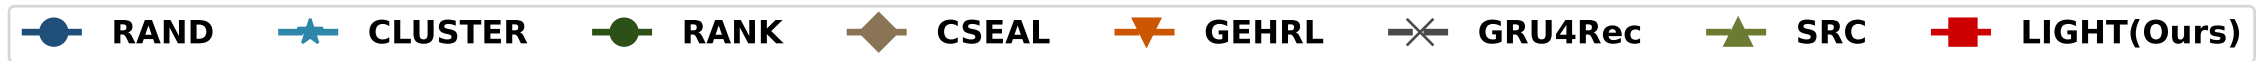

ASSIST09 Dataset

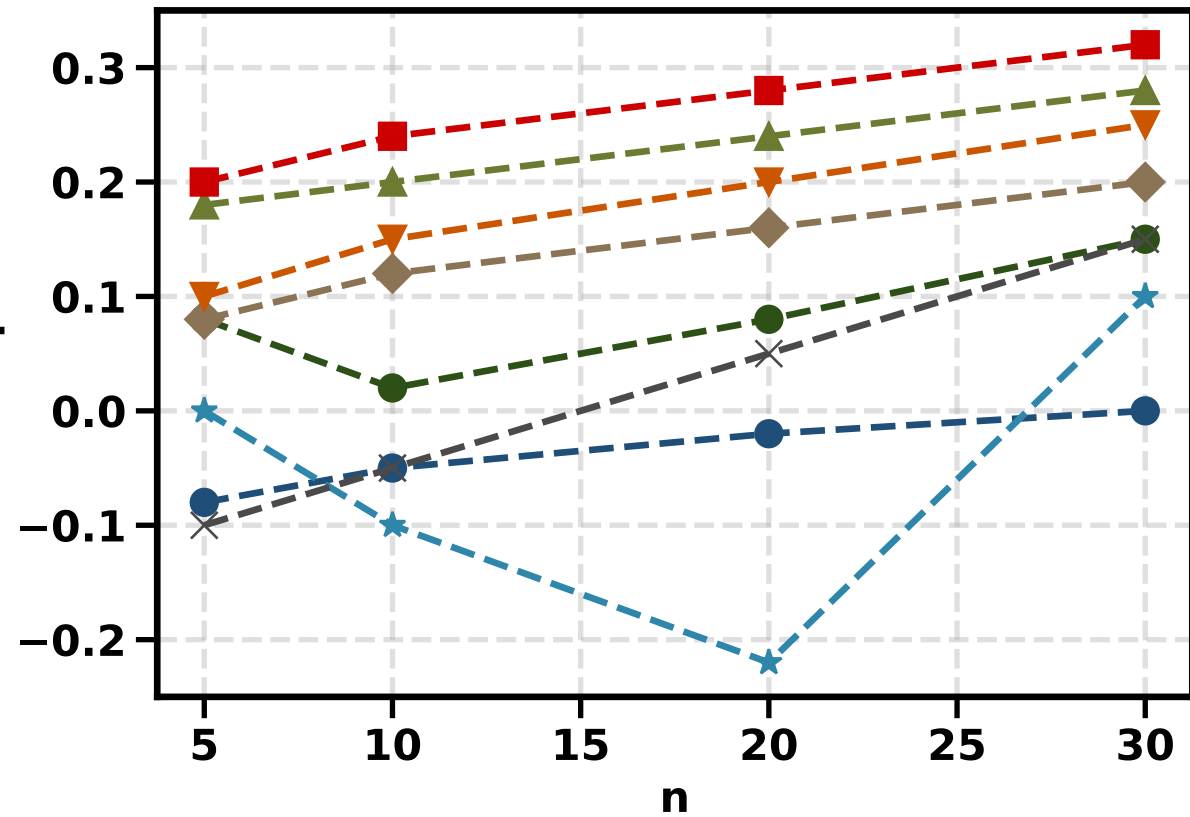

ASSIST12 Dataset

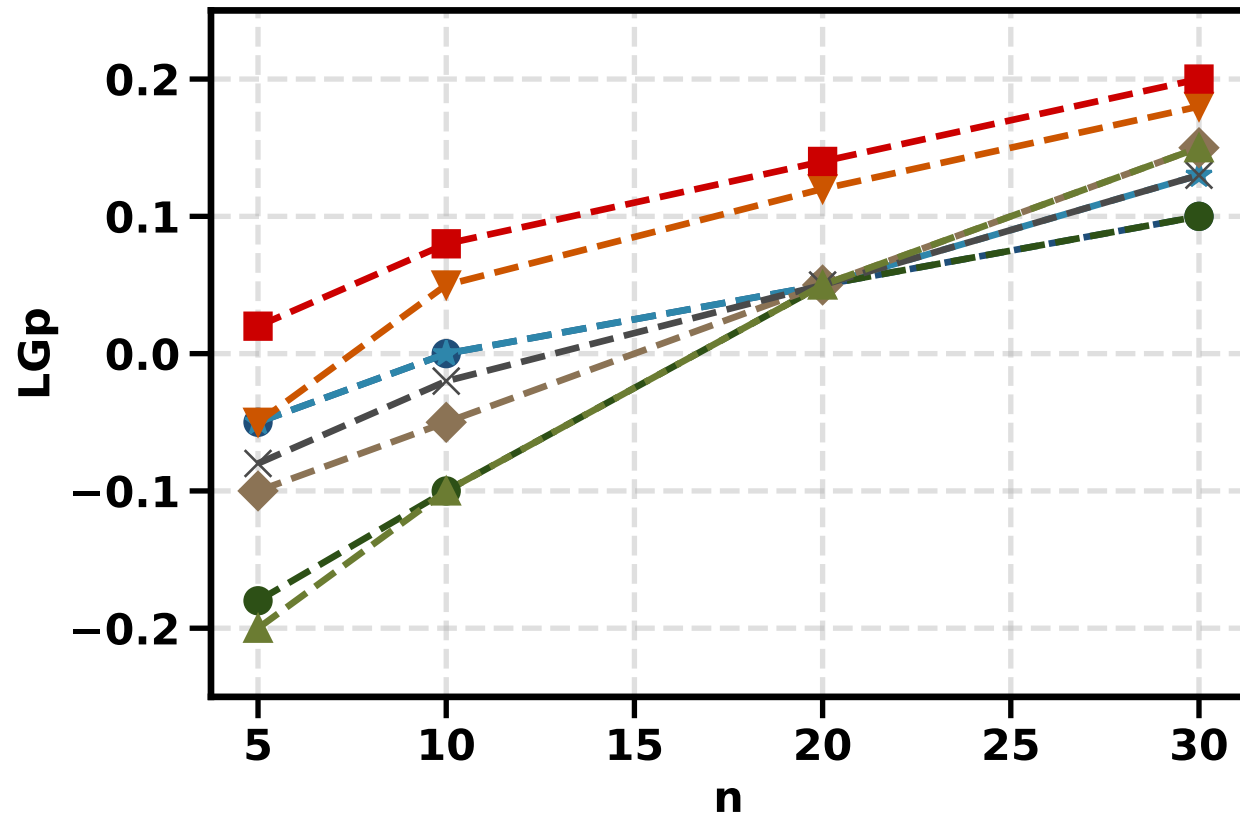

SLP-Math Dataset

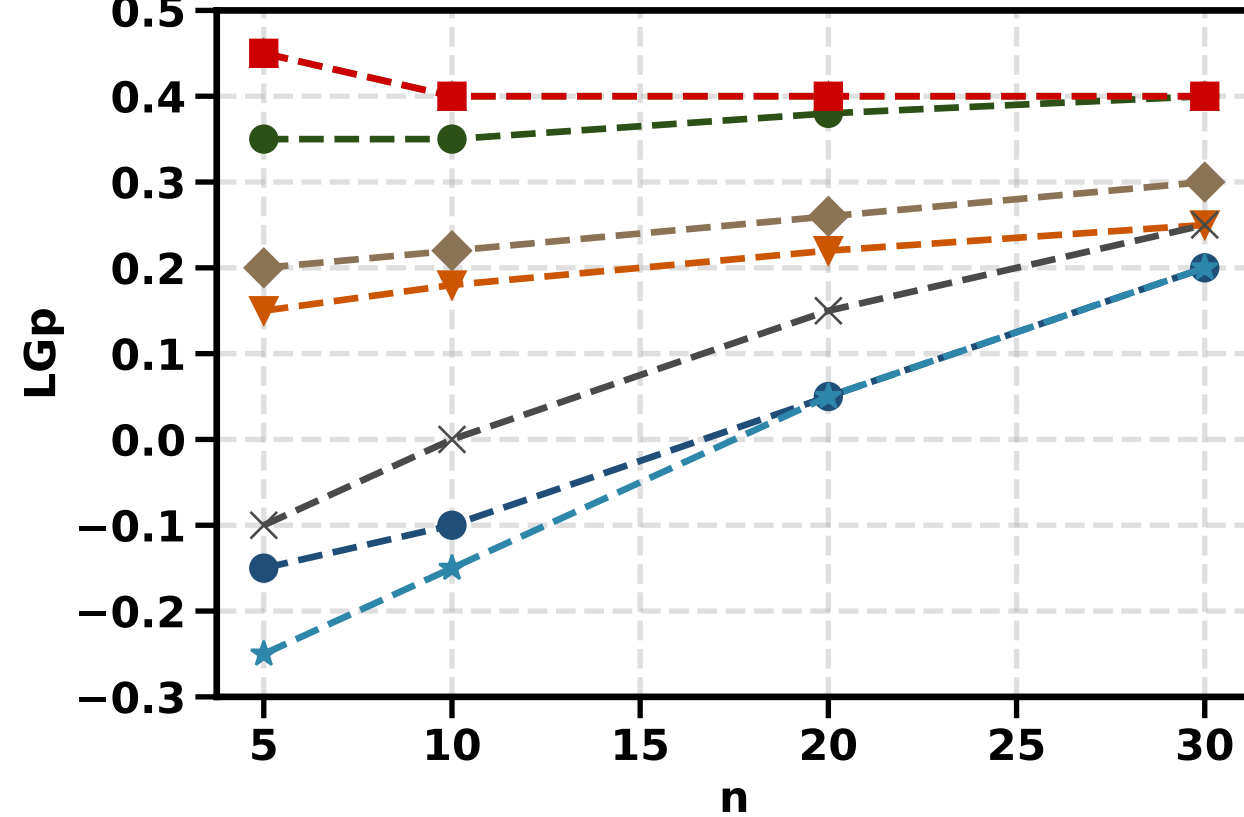

Supplement: Supplementary file 2 [file performance_comparison_final.pdf › IJCAI-main/analysis/performance_comparison_final.pdf]

# Performance Comparison of Different Methods

## ASSIST09 Dataset

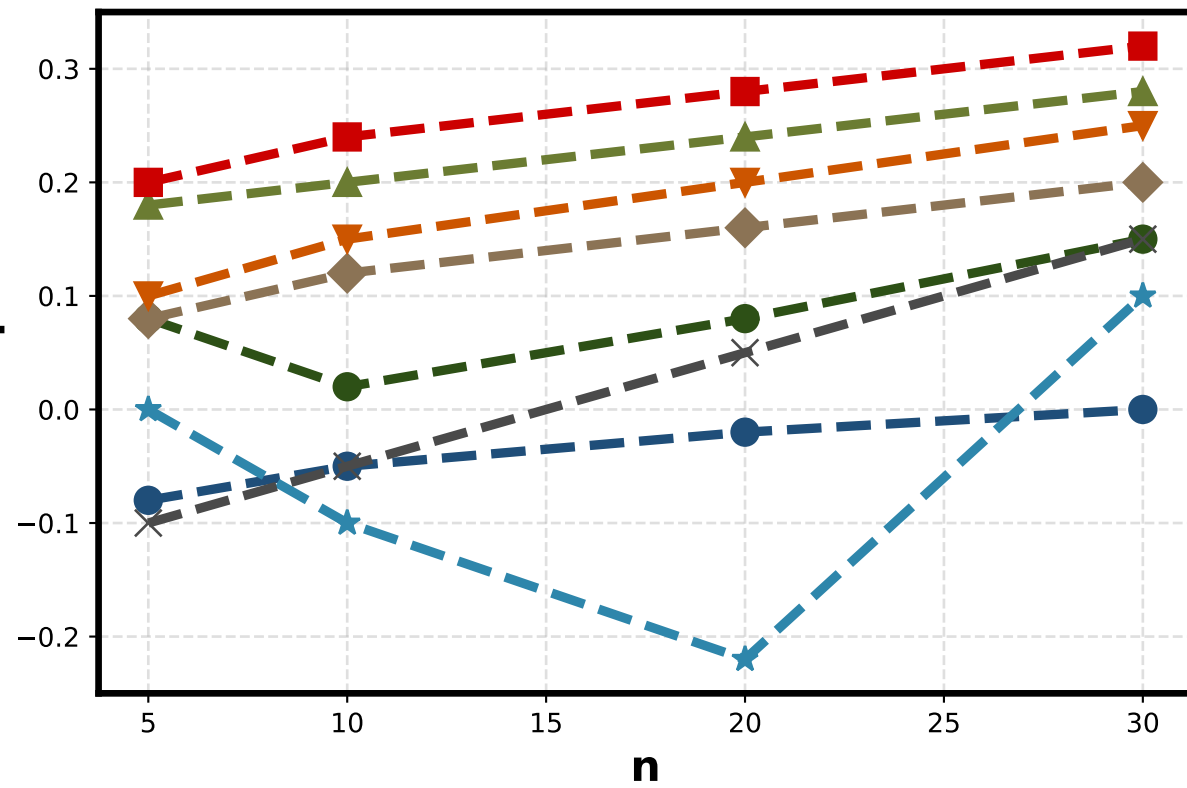

## ASSIST12 Dataset

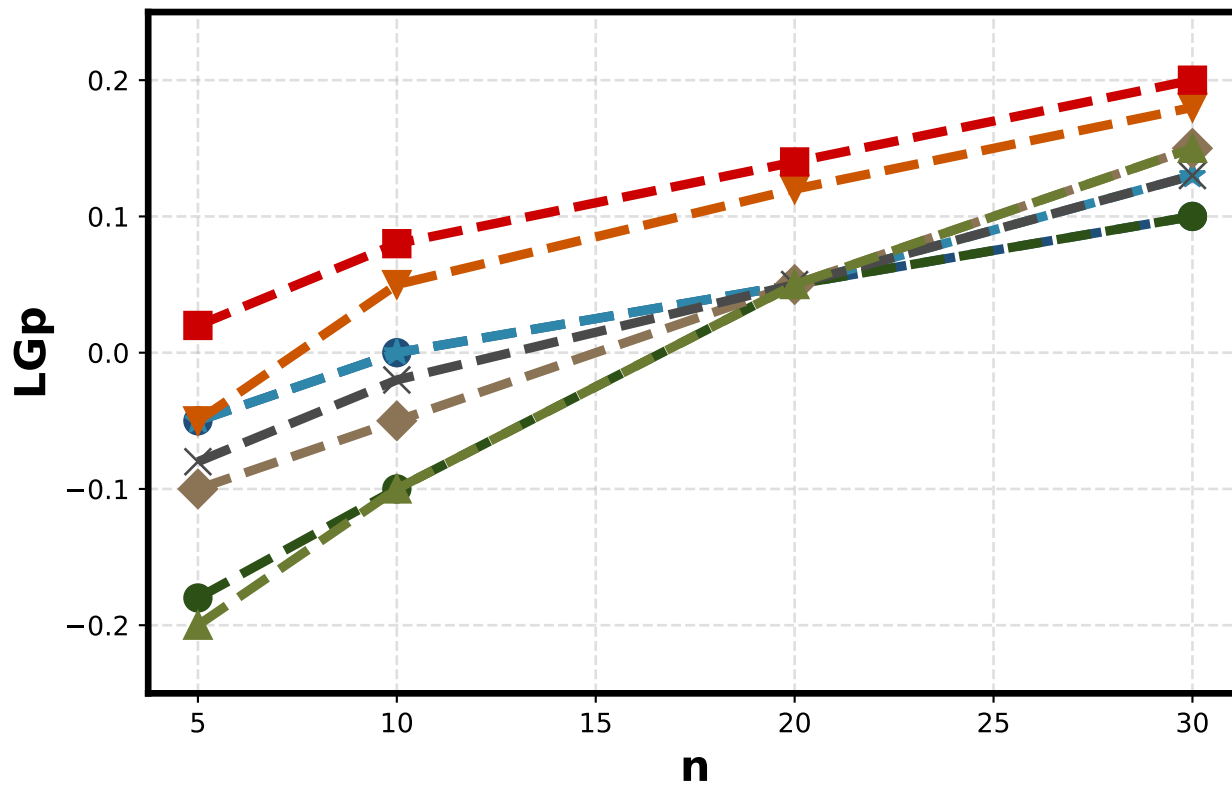

## SLP-Math Dataset

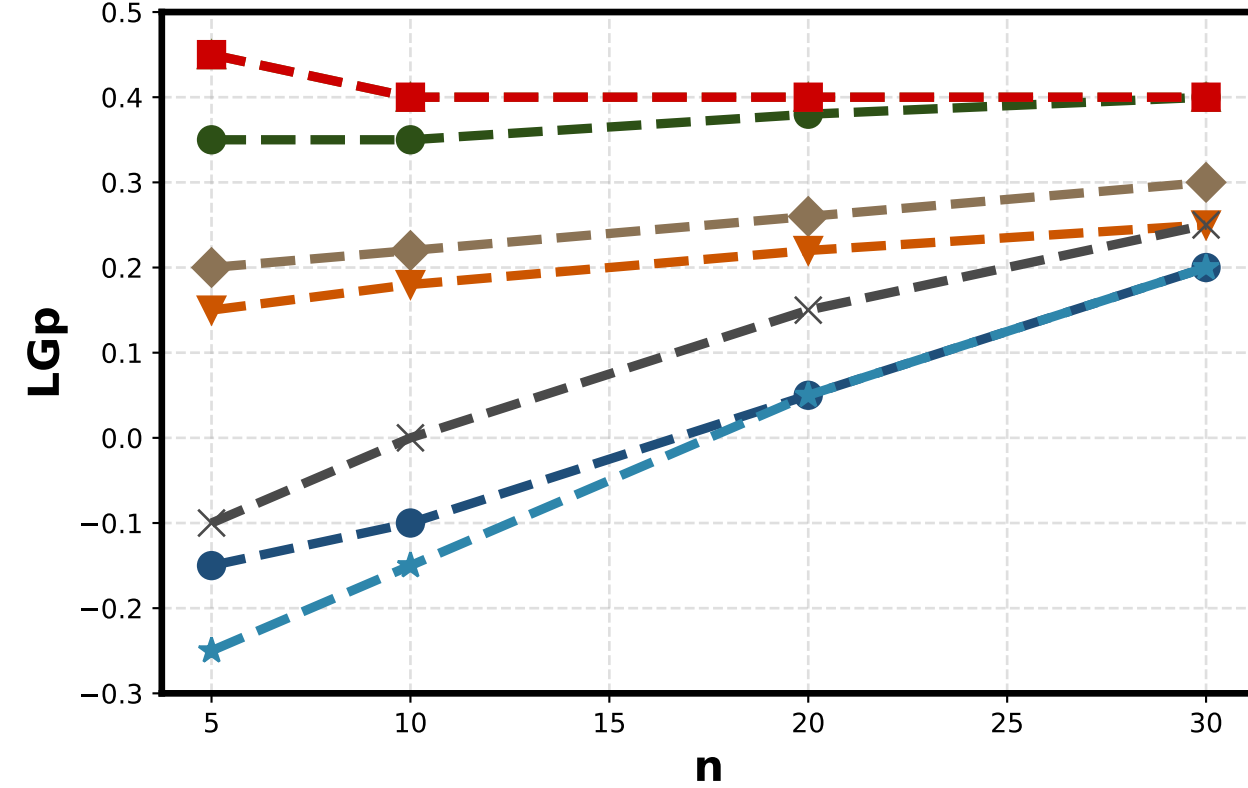

Supplement: Supplementary file 3 [file performance_comparison_optimized.pdf › IJCAI-main/analysis/performance_comparison_optimized.pdf]

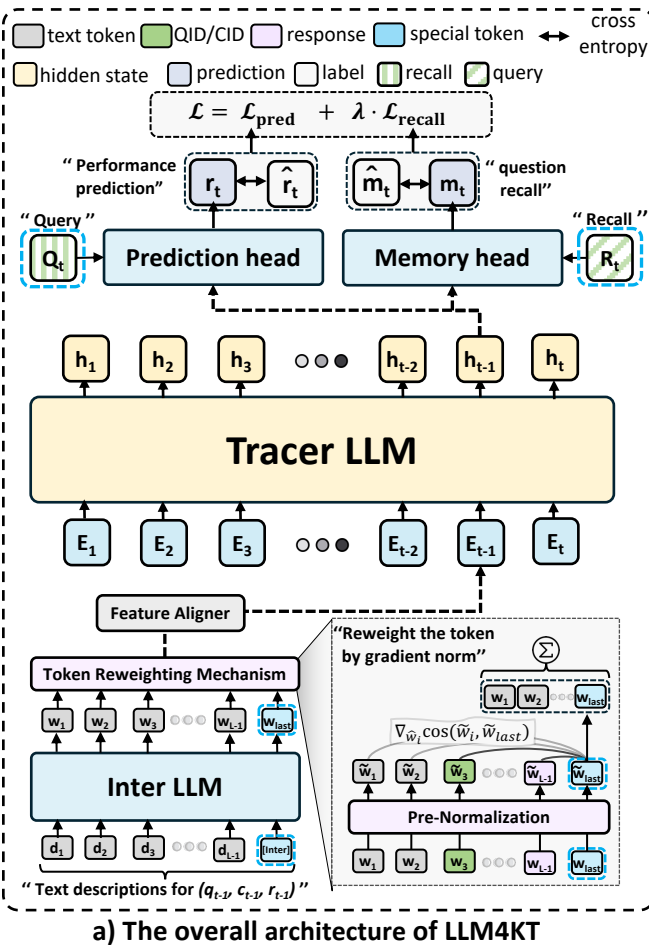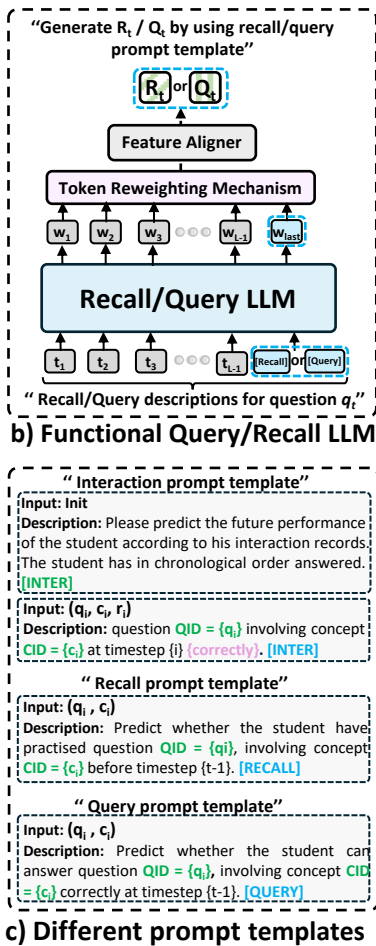

Supplement: Supplementary file 5 [file model4.pdf › IJCAI-main/paper/model4.pdf]
